# Supplementary material for: Structure, microstructure and magnetic investigation of the hexagonal δ-FeSe nanophase produced by mechanochemical synthesis
Source: Royal Society of Chemistry journal article supplement (doi:10.1039/d0ra08519g), 2020-01-01
Supplement: d0ra08519g1.pdf [file d0ra08519g1.pdf]

## Structure, microstructure and magnetic investigation of hexagonal $\delta$ -FeSe nanophase produced by mechanochemical synthesis

K.F. Ulbrich<sup>1</sup>, V.Z.C. Paes<sup>2</sup>, J. Geshev<sup>2</sup>, C. E. M. Campos<sup>1, a</sup>

<sup>1</sup> Departamento de Física, Universidade Federal de Santa Catarina, 88040-970 Florianópolis, Brasil

<sup>2</sup> Instituto de Física, Universidade Federal do Rio Grande do Sul, Porto Alegre 91501-970, Rio Grande do Sul, Brasil

<sup>a</sup> Corresponding author: [carlos.campos@ufsc.br](mailto:carlos.campos@ufsc.br); Tel.: +55 48 37212868

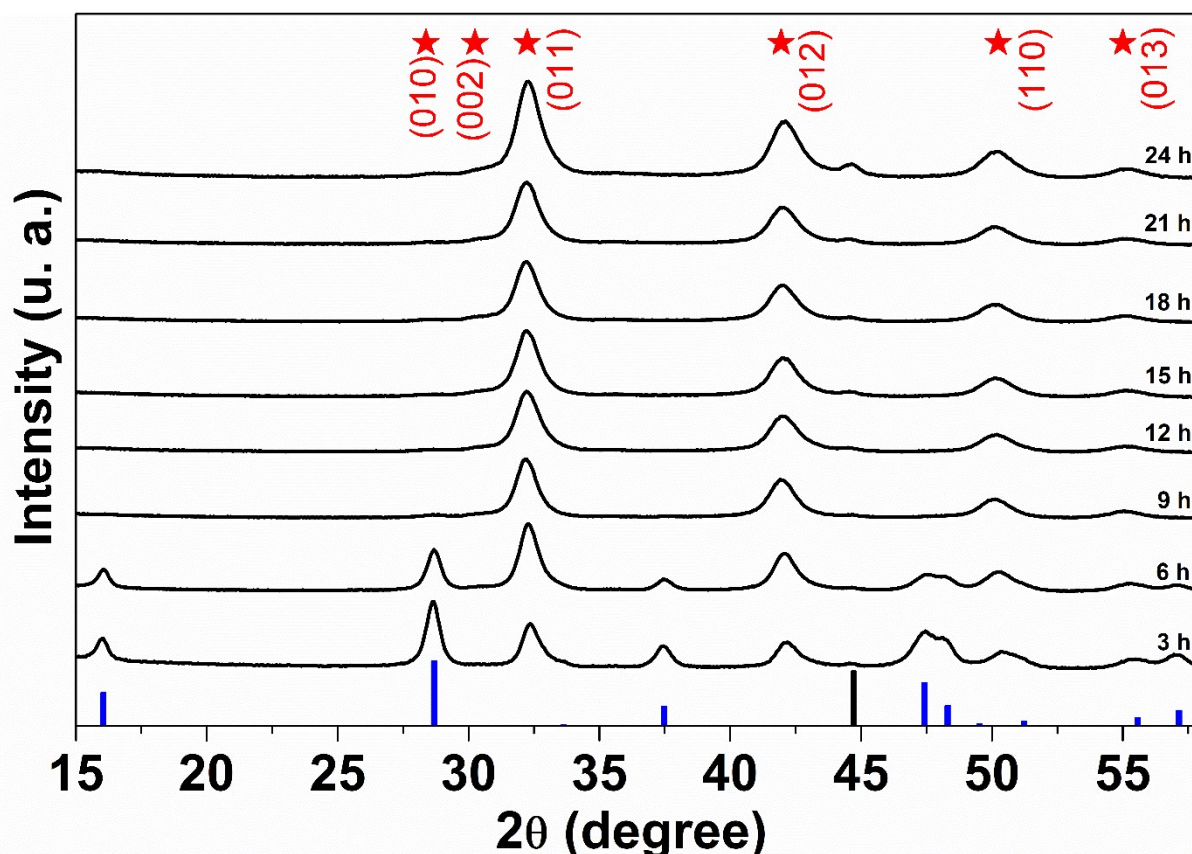

**Fig. S1 (a)** Experimental XRPD patterns (black lines) of the Fe<sub>50</sub>Se<sub>50</sub> samples produced for different processing times aged 4 years. The blue and black bars represent the peak positions and relative intensity of  $\beta$ -FeSe (ICSD 169251) and cubic Fe (ICSD 53802), respectively. The red stars represent the peak positions of  $\delta$ -FeSe (ICSD 53542).

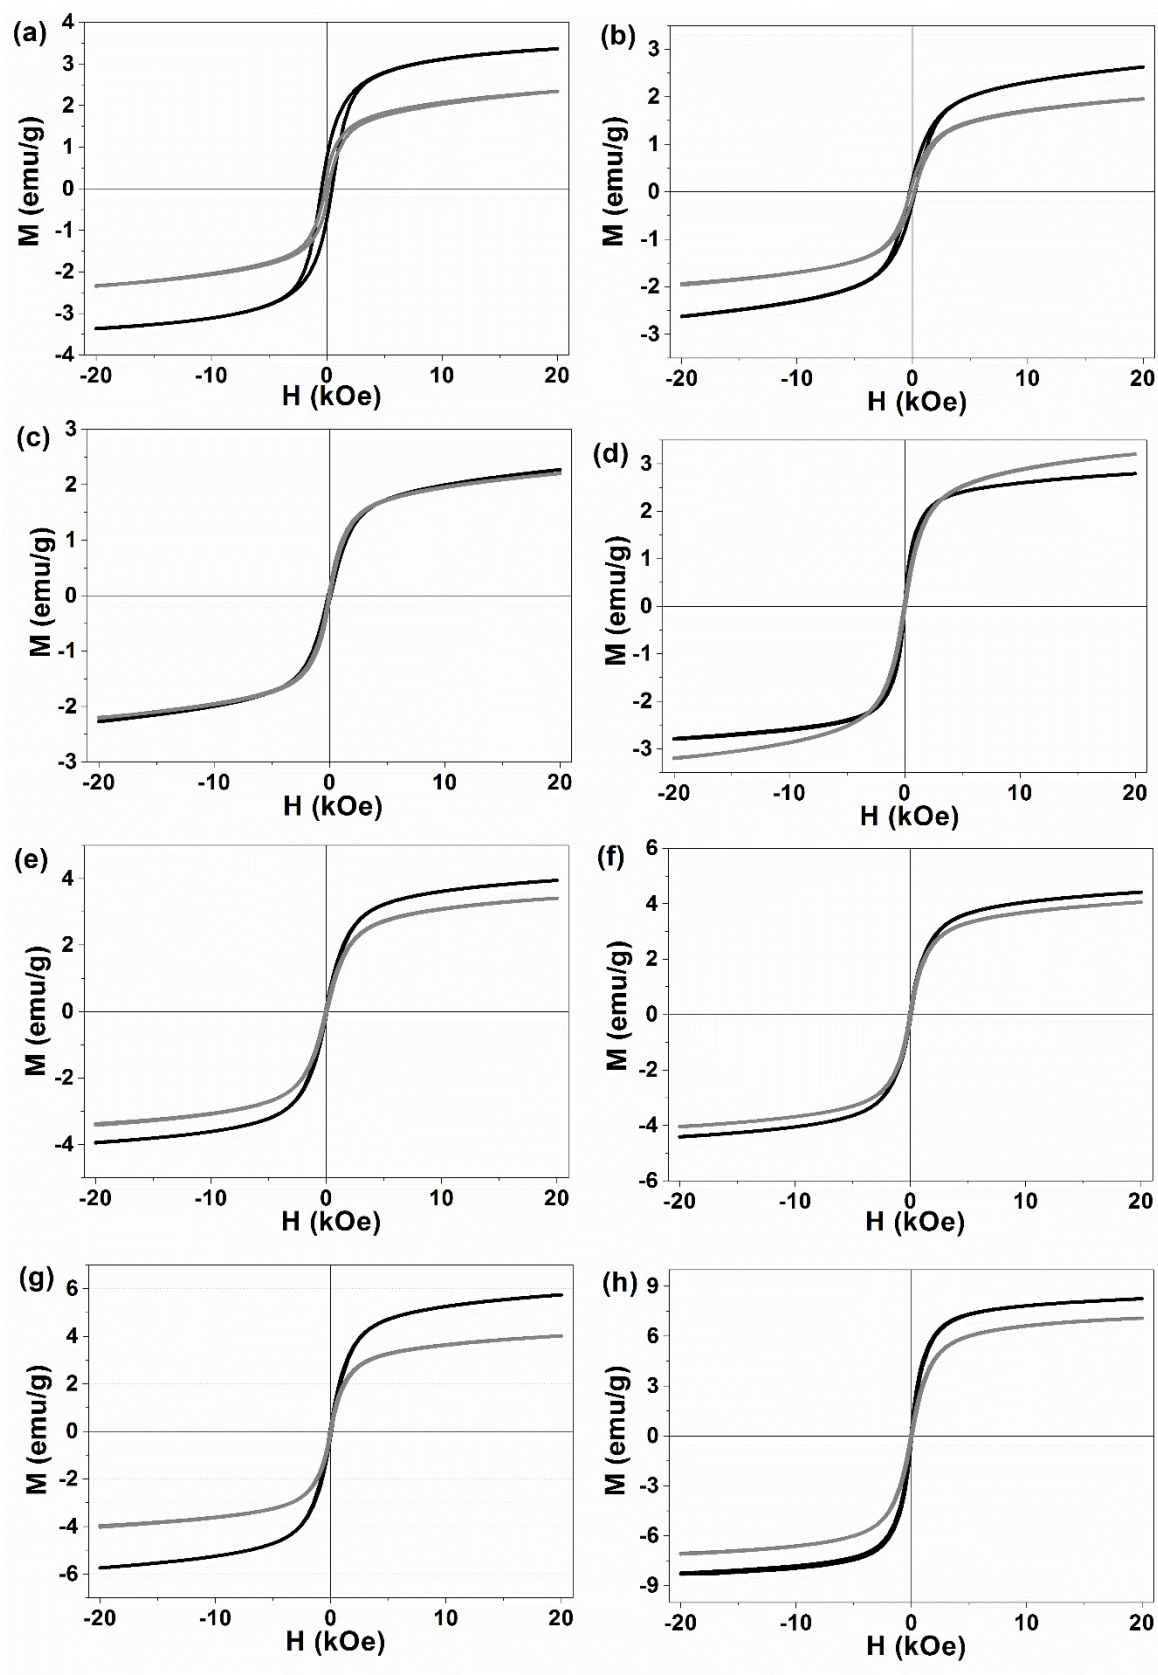

**Fig. S2** VSM measurements of the  $\text{Fe}_{50}\text{Se}_{50}$  samples milled for (a) 3 h (b) 6 h (c) 9 h (d) 12 h (e) 15 h (f) 18 h (g) 21 h and (h) 24 h. The black and gray curves represent the fresh and aged samples, respectively.
